# Supplementary material
Source: PubMed Central journal article supplement (PMC3121934)
Supplement: supp_data.pdf [file supp_data.pdf]

## Supplementary Data

**SUPPLEMENTARY FIG. S1.** Representation flow cytometric analyses of donor cell engraftment 8 weeks after primary transplantation as described in Figure 4.

**SUPPLEMENTARY FIG. S3.** Representation flow cytometric analyses of donor cell engraftment 12 weeks after secondary transplantation as described in Figure 5.

**SUPPLEMENTARY FIG. S2.** Representation flow cytometric analyses of donor cell engraftment 20 weeks after primary transplantation as described in Figure 4.

**SUPPLEMENTARY FIG. S4.** Representative flow cytometric analyses of apoptosis in the progeny of Lin<sup>-</sup>c-kit<sup>+</sup>Sca1<sup>+</sup> (LKS<sup>+</sup>) cells after ex vivo expansion as described in Figure 6A.
